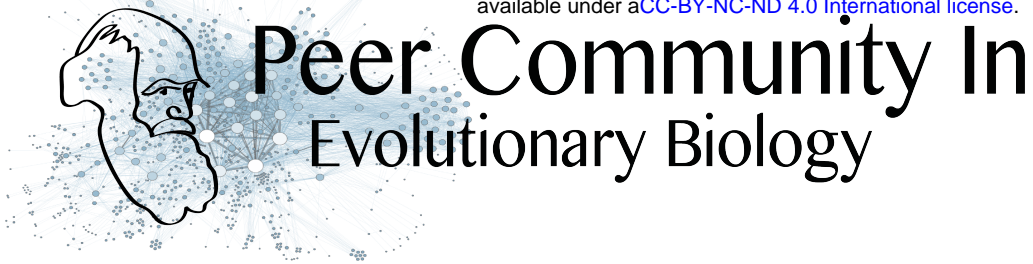

Kamiya T, Mideo N and Alizon S. 2017. **Coevolution of virulence and immunosuppression through multiple infections.** bioRxiv. *bioRxiv*, 149211, <https://doi.org/10.1101/149211>

**An article reviewed and recommended by *Peer Community In Evolutionary Biology*:**

<http://dx.doi.org/10.24072/pci.evolbiol.100043>

# Coevolution of virulence and immunosuppression in multiple infections

Tsukushi Kamiya <sup>1\*</sup>, Nicole Mideo <sup>1,2</sup>, Samuel Alizon <sup>3,4</sup>

<sup>1</sup> Department of Ecology & Evolutionary Biology, University of Toronto, Toronto, ON M5S 3B2, Canada

\* Corresponding author email: [tsukushi.kamiya@mail.utoronto.ca](mailto:tsukushi.kamiya@mail.utoronto.ca)

<sup>2</sup> Email: [nicole.mideo@utoronto.ca](mailto:nicole.mideo@utoronto.ca)

<sup>3</sup> Laboratoire MIVEGEC (UMR CNRS 5290, UR IRD 224, UM), Montpellier, France

<sup>4</sup> Email: [samuel.alizon@cnrs.fr](mailto:samuel.alizon@cnrs.fr)

**Running title:** Immunosuppression and virulence coevolution

**Keywords:** multiple infections, immunosuppression, virulence, epidemiology, evolution

This article contains 178 words in the abstract, approx. 4456 words in the main text (excluding abstract, acknowledgements, references, table and figure legends), 74 references, 4 figures and 1 table.

## Abstract

1  
2 This preprint has been reviewed and recommended by Peer Community In Evolutionary Bi-  
3 ology (<http://dx.doi.org/10.24072/pci.evolbiol.100043>). Many components  
4 of host-parasite interactions have been shown to affect the way virulence (i.e., parasite-induced  
5 harm to the host) evolves. However, coevolution of multiple parasite traits is often neglected. We  
6 explore how an immunosuppressive mechanism of parasites affects and coevolves with virulence  
7 through multiple infections. Applying the adaptive dynamics framework to epidemiological mod-  
8 els with coinfection, we show that immunosuppression is a double-edged-sword for the evolution  
9 of virulence. On one hand, it amplifies the adaptive benefit of virulence by increasing the abun-  
10 dance of coinfections through epidemiological feedbacks. On the other hand, immunosuppres-  
11 sion hinders host recovery, prolonging the duration of infection and elevating the cost of killing  
12 the host. The balance between the cost and benefit of immunosuppression varies across different  
13 background mortality rates of hosts. In addition, we find that immunosuppression evolution is  
14 influenced considerably by the precise trade-off shape determining the effect of immunosuppres-  
15 sion on host recovery and susceptibility to further infection. These results demonstrate that the  
16 evolution of virulence is shaped by immunosuppression while highlighting that the evolution of  
17 immune evasion mechanisms deserves further research attention.

## 18 **Introduction**

19 The fundamental question of virulence evolution, ‘Why do some parasite strains harm their hosts  
20 more than others?’, has been a central focus of evolutionary epidemiology for both its conceptual  
21 and applied significance (Ewald, 1994, Read, 1994, Schmid-Hempel, 2011, Méthot, 2012, Alizon  
22 and Michalakis, 2015). The adaptive explanation of virulence is typically centred around trade-offs  
23 involving virulence and other parasite fitness components, such as transmission and competitiveness  
24 in multiple infections (Anderson and May, 1982, Ewald, 1983, van Baalen and Sabelis, 1995, Alizon  
25 et al., 2009, 2013). While these trade-off theories explain the evolution of finite non-zero optimal  
26 virulence, exactly how much virulence a parasite should evolve depends on a variety of processes  
27 (Cressler et al., 2016). For example, host traits (e.g. host immune responses) and their interactions  
28 with coevolving parasite adaptations (e.g. parasite immune evasion strategies; Frank and Schmid-  
29 Hempel, 2008, Alizon, 2008b, Cressler et al., 2016) are likely to influence the trade-offs. The present  
30 theoretical study explores how a parasite immunosuppression strategy, namely the ability of parasites  
31 to hinder host recovery, coevolves with virulence.

32 The ability of parasites to suppress host immunity is ubiquitous in nature (Schmid-Hempel, 2009)  
33 and frequently helps maintain chronic infections (Virgin et al., 2009). In humans, for instance, in-  
34 fections by human papillomaviruses (HPVs) and human immunodeficiency virus (HIV) offer two  
35 contrasting immune suppression strategies: the former interferes with the cellular machinery to re-  
36 duce the presentation of viral antigens or impede the interferon response (Doorbar et al., 2012), while  
37 the latter infects and lyses T lymphocytes (Levy, 1998). In plant parasites, as well, a variety of mecha-  
38 nisms exist to suppress host defensive responses (Burgyán and Havelda, 2011, Sarmiento et al., 2011).  
39 Regardless of the specific host-parasite interaction, or mechanism involved, the adaptive benefit for  
40 the parasite is realised through prolonged infection duration (Schmid-Hempel, 2009). For the scope  
41 of our study, we generalise any parasite adaptation against host immunity that results in lowered host

42 recovery rate as immunosuppression.

43 In the absence of constraints, it is in the parasite's best interest to evolve maximal immunosup-  
44 pression, when immunity serves only to kill parasites. However, lowered host immunity is likely to  
45 impose at least one cost to the parasite: an immunocompromised host may be more vulnerable to fur-  
46 ther infection by conspecific and heterospecific parasites. A meta-analysis by [Graham \(2008\)](#) shows  
47 that lowered immune responses, due to the presence of an immunosuppressive helminth, increase  
48 microparasite population density within hosts. Furthermore, experimental evidence suggests that im-  
49 munosuppression could lead to increased host mortality through additional infections by opportunistic  
50 parasites ([Cornet and Sorci, 2010](#)). Therefore, multiple infections — which are so prevalent that they  
51 could be argued to be the rule rather than the exception ([Petney and Andrews, 1998](#), [Cox, 2001](#), [Read  
52 and Taylor, 2001](#), [Juliano et al., 2010](#), [Balmer and Tanner, 2011](#)) — are likely a key driver of the  
53 coevolution between virulence and immunosuppression.

54 If immunosuppression leads to more multiple infections, one might predict that this should lead  
55 to increased virulence. Many theoretical, and some empirical, studies support the notion that within-  
56 host competition leads to the evolution of higher virulence (reviewed in [Mideo, 2009](#)). Therefore,  
57 at the epidemiological level, as the density of coinfecting hosts increases, so does the optimal level  
58 of virulence ([van Baalen and Sabelis, 1995](#), [Choisy and de Roode, 2010](#)). However, given that the  
59 benefit of immunosuppression is assumed to be a longer duration of infection, increasing virulence  
60 would counteract this effect. Therefore, without a formal model, intuition fails to predict the direction  
61 in which virulence evolves when immunosuppression is considered.

62 To elucidate the coevolutionary dynamics of virulence and immunosuppression, we develop math-  
63 ematical epidemiology models, in which we assume that the two parasite traits are carried by the same  
64 parasite species (as in [van Baalen and Sabelis, 1995](#)). Furthermore, we also investigate how the co-  
65 evolved optimal strategy is affected by host background mortality and trade-off concavity determining  
66 the effect of immunosuppression on host recovery and susceptibility to further infection.

## 67 **The model**

68 We use an evolutionary epidemiology approach based on adaptive dynamics theory (Geritz et al.,  
69 1998, Dieckmann et al., 2002, Otto and Day, 2007). We first present the epidemiological model  
70 itself, then the evolutionary trade-offs that constrain evolution and finally we show how the (co-  
71 )evolutionary analyses are conducted.

## 72 **Epidemiological dynamics**

73 We employ a coinfection framework, which allows for coexistence of two parasite strains within a  
74 host. Existing coinfection models track either two different resident strains belonging to different  
75 species (Choisy and de Roode, 2010) (Fig. 1a), or more simply, a single resident species (van Baalen  
76 and Sabelis, 1995) (Fig. 1b). While the two models differ in biological motivations, conceptually, the  
77 latter is a special case of the former: the two models are identical if the within-host interactions are the  
78 same between the two species (Alizon et al., 2013). Here, we employ the single species model (Fig.  
79 1b) which allows us to study the coevolution of virulence and immunosuppression without making  
80 assumptions about how two parasite species are different; thereby requiring fewer parameters. In  
81 this model, hosts are divided into three classes: susceptible, singly infected and doubly infected,  
82 occurring at densities  $S$ ,  $I$  and  $D$  respectively. Following the notation of Table 1, we derive the  
83 following system of ordinary differential equations (ODEs) to describe the changes of the resident  
84 system over continuous time:

$$\frac{dS}{dt} = \rho - \mu S - \lambda_r S + \gamma(\theta) I_r \quad (1a)$$

$$\frac{dI_r}{dt} = \lambda_r S - (\mu + \alpha(x)) I_r - \sigma(\theta) \lambda_r I_r - \gamma(\theta) I_r + 2 \gamma(\theta) D_{rr} \quad (1b)$$

$$\frac{dD_{rr}}{dt} = \sigma(\theta) \lambda_r I_r - (\mu + \alpha(x)) D_{rr} - 2 \gamma(\theta) D_{rr} \quad (1c)$$

85 where the subscript  $r$  denotes the resident parasite strain. In this formulation, there is a constant

86 input of susceptible hosts into the population at the rate  $\rho$ . Susceptible hosts exit the system through  
87 background mortality at the rate  $\mu$ , while infected hosts, both singly and doubly infected individuals,  
88 experience additional mortality caused by parasites (i.e., virulence  $\alpha$ ). Susceptible and singly infected  
89 hosts acquire infection according to the force of infection  $\lambda_r = \beta I_r + \beta D_{rr}$ , where  $\beta$  corresponds to  
90 the parasite transmission rate. The host class for double infection by the same strain,  $D_{rr}$  is included  
91 in the system for a technical motivation: it is necessary for an unbiased invasion analysis because the  
92 mutant strain would gain a frequency-dependent advantage in its absence (discussed in [Alizon, 2008a](#),  
93 [Lipsitch et al., 2009](#)). We assume that the rate of recovery,  $\gamma(\theta)$ , and susceptibility to coinfection,  
94  $\sigma(\theta)$ , are functions of immunosuppression,  $\theta$ . Within the existing epidemiological framework, the  
95 effect of host immunity can be implicitly accounted for as the rate of recovery (equivalent to the  
96 rate of parasite clearance). We assume that hosts recover from infection at a rate  $\gamma(\theta)$ , in a stepwise  
97 fashion, i.e., doubly infected hosts ( $D$ ) only lose one infection at a time). The key feature of our  
98 model is that we assume that singly infected hosts ( $I$ ) suffer an increased risk of contracting a further  
99 infection at a rate proportional to a coefficient  $\sigma(\theta)$ . We treat the host class  $D_{rr}$  similarly to singly  
100 infected hosts  $I_r$ , except for the fact that the doubly infected hosts cannot be infected any further.

## 101 **Within-host processes and resulting trade-offs**

102 It is commonly assumed that virulence (i.e., parasite-induced host mortality) correlates with the extent  
103 of parasite resource exploitation. Adaptive benefits of resource exploitation include the positive cor-  
104 relation with transmission ([Fraser et al., 2007](#), [de Roode et al., 2008](#), [Råberg, 2012](#)), and a within-host  
105 competitive advantage in coinfection ([de Roode et al., 2005](#), [Bell et al., 2006](#), [Ben-Ami et al., 2008](#),  
106 [Zwart et al., 2009](#)). Here, we focus on the latter adaptive benefit to study the evolution of virulence  
107 and immunosuppression. We assume that virulence ( $\alpha$ ) increases linearly with the level of resource  
108 exploitation by a parasite ( $x$ ), such that  $\alpha(x) = a x$ , where  $a$  is a proportionality constant (we explore  
109 a transmission-virulence trade-off in the Supplementary Information 2). We then assume that finding

110 themselves in a doubly infected host is inherently costly for parasites due to exploitation competition  
111 between coinfecting strains (Mideo, 2009, Schmid-Hempel, 2011), and that more virulent strains are  
112 more competitive in multiple infections:

$$\beta_{rm}(x_r, x_m) = \left( \frac{x_r}{x_r + x_m} \right) \beta \quad (2a)$$

$$\beta_{mr}(x_r, x_m) = \left( \frac{x_m}{x_r + x_m} \right) \beta. \quad (2b)$$

113 There is ample empirical evidence that immunosuppression benefits the parasites by prolonging  
114 infections (reviewed in Schmid-Hempel, 2008), and lowered host immunity would increase the sus-  
115 ceptibility to multiple infections (Palefsky and Holly, 2003, Rockstroh and Spengler, 2004, Cornet  
116 and Sorci, 2010). Thus, the key trade-off in our model is between infection duration and susceptibil-  
117 ity to coinfections (both being mediated by immunosuppression). We, therefore, assume a trade-off  
118 between the rate of recovery,  $\gamma(\theta)$ , and additional susceptibility of infected hosts to coinfection,  $\sigma(\theta)$ ,  
119 by making them both functions of immunosuppression intensity,  $\theta$ . It is conceivable for the decline  
120 of recovery rate and the increase of additional susceptibility to either accelerate or decelerate with  
121 increasing immunosuppression. Because the trade-off shape typically matters for evolutionary dy-  
122 namics (Bowers et al., 2005, Kisdi, 2006) and little is known from empirical data, we explore the  
123 trade-offs involving recovery and susceptibility as both accelerating and decelerating functions of  
124 immunosuppression. The parameters  $\delta_\gamma$  and  $\delta_\sigma$  control the degree of concavity of the effect of im-  
125 munosuppression on recovery and increased susceptibility, respectively (eq. 3; Fig. S1).



$$\gamma(\theta) = \gamma_{\max} \begin{cases} \left(1 - \frac{\theta}{\theta_{\max}}\right)^{\delta_{\gamma}}, & \text{if accelerating} \\ 1 - \left(\frac{\theta}{\theta_{\max}}\right)^{\delta_{\gamma}}, & \text{if decelerating} \end{cases} \quad (3a)$$

$$\sigma(\theta) = 1 + \sigma_{\text{range}} \begin{cases} 1 - \left(1 - \frac{\theta}{\theta_{\max}}\right)^{\delta_{\sigma}}, & \text{if accelerating} \\ \left(\frac{\theta}{\theta_{\max}}\right)^{\delta_{\sigma}}, & \text{if decelerating} \end{cases} \quad (3b)$$

126 With these functions, we assume that the realised recovery rate,  $\gamma(\theta)$ , decreases as a function  
 127 of immunosuppression such that it equals the intensity of host immunity,  $\gamma_{\max}$ , in the absence of  
 128 immunosuppression and approaches 0 as immunosuppression approaches  $\theta_{\max}$ . We also assume that  
 129 the proportional gain in susceptibility to a further infection,  $\sigma(\theta)$ , elevates the force of infection  
 130 experienced by an immunosuppressed singly infected host by up to  $1 + \sigma_{\text{range}}$  fold at the upper limit of  
 131 immunosuppression (when  $\theta = \theta_{\max}$ ). Because it is commonly assumed that the pay-off of a beneficial  
 132 trait saturates, we set the recovery trade-off as decelerating at default. We set the default susceptibility  
 133 trade-off as accelerating to further emphasise the difference between beneficial and costly traits.

## 134 Evolutionary analyses

### 135 The mutant systems

136 We carry out an invasion analysis investigating perturbation of the resident state by adding a rare mu-  
 137 tant strain, the densities and traits of which are denoted with subscript  $m$  (Fig. 1b). For the evolution  
 138 of immunosuppression, the dynamics of the mutant strain are summarised in the following system of  
 139 ODEs:

$$\frac{dI_m}{dt} = \lambda_m S - (\mu + \alpha) I_m - \sigma(\theta_m) \lambda_r I_m - \gamma(\theta_m) I_m + \gamma(\theta_{rm}) D_{rm} \quad (4a)$$

$$\frac{dD_{rm}}{dt} = \sigma(\theta_r) \lambda_m I_r + \sigma(\theta_m) \lambda_r I_m - (\mu + \alpha) D_{rm} - 2 \gamma(\theta_{rm}) D_{rm} \quad (4b)$$

**Table 1: Parameter notation, description and default values.** Parameter values chosen to sustain non-zero and non-complex equilibria for the resident system and relevant evolutionarily singular strategies. Parameters that are functions of others are indicated with the dependent parameters (or variables) inside parentheses. When we allow only immunosuppression to evolve, virulence,  $\alpha$ , is a constant; otherwise,  $\alpha$  evolves as a function of  $a$  and  $x$ . Rates are in units of per day.

| Symbol                                 | Description                                               | Value (or range)           |
|----------------------------------------|-----------------------------------------------------------|----------------------------|
| $\rho$                                 | Susceptible host birth rate                               | 100                        |
| $\mu$                                  | Background mortality rate                                 | [0.001, 0.1]               |
| $\beta$                                | Transmission rate                                         | 0.001                      |
| $\lambda$                              | Force of infection                                        | $\lambda(\beta, I, D)$     |
| $\alpha$                               | Virulence: parasite-induced mortality                     | [0, 0.5] or $\alpha(a, x)$ |
| $\gamma$                               | Realised recovery rate                                    | $\gamma(\theta)$           |
| $\sigma$                               | Increased susceptibility of infected hosts                | $\sigma(\theta)$           |
| $\theta$                               | Immunosuppression                                         | [0, 100]                   |
| $\theta_{\max}$                        | Maximum immunosuppression                                 | 100                        |
| $\gamma_{\max}$                        | Maximum host recovery rate                                | 0.5                        |
| $1 + \sigma_{\text{range}}$            | Maximum susceptibility coefficient                        | [1, 5]                     |
| $\{\delta_{\gamma}, \delta_{\sigma}\}$ | Recovery-coinfection susceptibility trade-off curve shape | {0.05, 0.25}               |
| $a$                                    | Virulence scaling parameter                               | 0.1                        |
| $x$                                    | Resource exploitation rate                                | [0.001, 5]                 |

140 where  $\lambda_r = \beta I_r + \beta D_{rr} + \beta_{rm} D_{rm}$  and  $\lambda_m = \beta I_m + \beta_{mr} D_{rm}$ . For simplicity we assume that the  
141 order of infection does not matter so that  $D_{rm}$  is identical to  $D_{mr}$ . We neglect hosts infected twice by  
142 the mutant strain (which would be  $D_{mm}$ ) because it is unlikely that the same host gets infected twice  
143 by a rare mutant. Recovery from  $D_{rm}$  can be achieved through either clearing a resident or a mutant  
144 parasite. Other aspects of demographic changes of the mutant system are identical to the resident  
145 system described above.

146 We assume that the level of immunosuppression in coinfection is the average between the resident  
147 and mutant strain, i.e.,  $\theta_{rm} = \frac{\theta_r + \theta_m}{2}$ . For virulence evolution, we assume that the only within-host  
148 interaction between coinfecting parasites is competition for the shared host resources. Therefore, we  
149 also calculate the overall virulence of coinfection as the average of the two strains, i.e.  $\alpha_{rm} = \frac{\alpha_r + \alpha_m}{2}$ .

150 The mutant dynamics for virulence evolution are governed by

$$\frac{dI_m}{dt} = \lambda_m S - (\mu + \alpha(x_m))I_m - \lambda_r \sigma(\theta)I_m - \gamma(\theta)I_m + \gamma(\theta)D_{rm} \quad (5a)$$

$$\frac{dD_{rm}}{dt} = \lambda_m \sigma(\theta)I_r + \lambda_r \sigma(\theta)I_m - (\mu + \alpha_{rm})D_{rm} - 2\gamma(\theta)D_{rm} \quad (5b)$$

151 where  $\lambda_r$  and  $\lambda_m$  are the force of infection for the resident and mutant, respectively, defined here  
152 as  $\beta I_r + \beta D_{rr} + \beta_{rm} D_{rm}$  and  $\beta I_m + \beta_{mr} D_{rm}$ . We again assume the trade-offs between recovery and  
153 coinfection susceptibility as functions of immunosuppression in this model.

## 154 Adaptive dynamics

155 The fate of a rare mutant strain is determined by its fitness function (here denoted  $R_{\theta_m}$  and  $R_{\alpha_m}$ ,  
156 respectively), that is, the ability to spread through a host population already infected with a resident  
157 parasite (Geritz et al., 1998, Dieckmann et al., 2002). In the continuous time scale, the mutant parasite  
158 invades and replaces the resident if the mutant fitness, calculated as the dominant eigenvalue of the  
159 Jacobian matrix of the mutant system, is positive (Otto and Day, 2007). The expressions for the

160 invasion fitness of a rare mutant — with respect to immunosuppression and virulence ( $R_{\theta_m}$  and  $R_{\alpha_m}$ ,  
 161 respectively) — emerging in a population infected by a resident strain are:

$$R_{\theta_m} = \frac{\beta(1 + \frac{1}{2} \frac{1}{\mu + \alpha + \gamma \frac{\theta_r + \theta_m}{2}} \sigma(\theta_m) \lambda_r)}{\mu + \alpha + \gamma(\theta_m) + \sigma(\theta_m) \lambda_r} \tilde{S} + \sigma(\theta_r) \frac{\frac{\beta}{2}}{\mu + \alpha + \gamma \frac{\theta_r + \theta_m}{2}} \tilde{I}_r \quad (6a)$$

$$R_{\alpha_m} = \frac{\beta(1 + \frac{\frac{x_m}{x_r + x_m}}{\mu + 2\gamma(\theta) + \frac{\alpha(x_r) + \alpha(x_m)}{2}} \sigma(\theta) \lambda_r)}{\mu + \alpha(x_m) + \gamma(\theta) + \sigma(\theta) \lambda_r} \tilde{S} + \sigma(\theta) \frac{\beta \frac{x_m}{x_r + x_m}}{\mu + 2\gamma(\theta) + \frac{\alpha(x_r) + \alpha(x_m)}{2}} \tilde{I}_r \quad (6b)$$

162 Consequently, an evolutionarily singular strategy can be found where the change of the invasion  
 163 fitness ceases with respect to the evolving trait. For example, an evolutionarily singular strategy of  
 164 immunosuppression (denoted  $\theta^*$ ) can be found when  $\theta^*$  is an extremum of  $R_{\theta_m}$ :

$$\left. \frac{\partial R_{\theta_m}}{\partial \theta_m} \right|_{\theta_m = \theta_r = \theta^*} = 0. \quad (7)$$

165 The properties of a singular strategy can then be assessed by the second derivatives of  $R_{\theta_m}$ . Fol-  
 166 lowing the notations used by Geritz et al. (1998), here we denote the second derivatives of  $R_{\theta_m}$  with  
 167 respect to the resident and mutant strain with  $a$  and  $b$ :

$$a = \left. \frac{\partial^2 R_{\theta_m}}{\partial \theta_r^2} \right|_{\theta_m = \theta_r = \theta^*}, \quad b = \left. \frac{\partial^2 R_{\theta_m}}{\partial \theta_m^2} \right|_{\theta_m = \theta_r = \theta^*} \quad (8)$$

168 The convergence stable ES (i.e. the strategy towards which selection drives the population and that  
 169 is also non-invasible by mutants; i.e., evolutionarily stable and convergence stable, or the continuously  
 170 stable strategy, CSS *sensu* Eshel (1983)) condition is satisfied when  $b < 0$  and  $a - b > 0$ . The first  
 171 condition states that the mutant fitness is at a local maximum and hence evolutionarily stable and  
 172 the second condition implies no mutant invasion is possible at the point, meaning convergence stable  
 173 (Geritz et al., 1998). Various other possible configurations of evolutionarily and convergence stability  
 174 are discussed in Geritz et al. (1998).

## 175 **Coevolution of virulence and immunosuppression**

176 We graphically identified the coevolutionarily singular state as the intersection between the singular  
177 state of immunosuppression and virulence (Choisy and de Roode, 2010, Alizon, 2013). When this  
178 intersection is both convergence and evolutionarily stable, it can be interpreted as the coevolutionarily  
179 stable strategy (Maynard Smith, 1982, Marrow et al., 1996, Dieckmann et al., 2002). The conditions  
180 for coevolutionary stability are given in detail by (Abrams et al., 1993, Marrow et al., 1996). In brief,  
181 the stability of each co-evolving trait is neither sufficient nor necessary, and there is no simple set of  
182 criteria that guarantees local asymptotic stability. We explore the coevolution of the two traits across  
183 different extrinsic mortality conditions and immunosuppression trade-off concavity.

## 184 **Results**

### 185 **Virulence evolution**

186 We first assume that the level of immunosuppression is constant and infer the virulence level towards  
187 which the parasite population evolves, that is the evolutionarily stable virulence (ESV). We find that  
188 the higher the immunosuppression, the higher the ESV (grey curve in Fig. 2a). Because immuno-  
189 suppression renders infected hosts more susceptible to further infections, it consequently increases  
190 the relative abundance of doubly infected hosts (Fig. 2e). This favours more virulent parasites due to  
191 within-host competition (see equation 2).

### 192 **Immunosuppression evolution**

193 We then set the virulence to a constant value and study whether parasite immunosuppression evolves  
194 towards an evolutionarily stable strategy (i.e., evolutionarily stable immunosuppression, or ESI; black  
195 curve in Fig. 2a). We find that ESI decreases with virulence at first, but it increases again when viru-

196 lence is high enough. The initial decrease can be attributed to two non-mutually exclusive processes.  
197 First, the benefits gained by increasing immunosuppression (i.e., slower host recovery) are reduced  
198 as virulence increases since the duration of infection decreases. Note that ESI similarly decreases as  
199 host mortality increases (Fig. 3a). Second, the decreasing pattern may originate from demographic  
200 feedbacks: increasing virulence reduces coinfections, therefore parasites reap the benefit of immuno-  
201 suppression in reduced recovery without paying the cost of contracting further infections. Therefore,  
202 the initial decrease in ESI with virulence is also likely mediated by the falling fraction of multiple  
203 infections (Fig. 2d).

204 We also find that the ESI increases with virulence when virulence is high enough. As the lifespan  
205 of an infected host decreases due to high parasite-induced mortality, it becomes unlikely for a host to  
206 survive a single infection long enough to get infected again. At this point, coinfections are sufficiently  
207 rare (Fig. 2d) that highly immunosuppressive parasites would rarely suffer the cost of immunosup-  
208 pression in contracting further infections. Taken together, focusing on the prevalence of coinfections  
209 alone is not enough to predict how ESI will evolve.

## 210 **Coevolution of virulence and immunosuppression**

211 The co-ESS is found at the intersection between the two curves in Figure 2. For our default param-  
212 eters, this occurs at intermediate values of immunosuppression and virulence. We now investigate  
213 how changes in host mortality and the trade-off shapes determining the effect of immunosuppression  
214 on host recovery and susceptibility to further infection affect this co-ESS. We first explore how the  
215 co-ESS varies with respect to the rate of host background mortality. We find that co-ES immunosup-  
216 pression (co-ESI) always decreases with host background mortality (black line in Fig. 3a), in accord  
217 with the intuition that immunosuppression represents a lost investment if the host dies too rapidly.

218 In the absence of immunosuppression, as found in previous models (van Baalen and Sabelis,  
219 1995, Gandon et al., 2001), the optimal virulence decreases with host background mortality because

220 the higher the mortality, the lesser the chance of coinfection from which the benefit of virulence is  
221 realised (dashed grey line in Fig. 3a & purple area in b). In contrast, we find that virulence coe-  
222 volving with immunosuppression (co-ESV), peaks at an intermediate value of background mortality  
223 (solid grey line in Fig. 3a). Considering an extreme case in which the host never dies through back-  
224 ground mortality (i.e.,  $\mu = 0$ ), the best strategy for the parasite is to evolve avirulence and maximise  
225 immunosuppression so that the host remains infected forever (Fig. 3a). This scenario can be inter-  
226 preted as an alignment of interest between resident and mutant strains as the benefit of keeping the  
227 host alive longer appears to outweigh the adaptive advantage of being competitively dominant. With  
228 zero mortality and maximum immunosuppression, a parasite's fitness is infinite: any mutant with  
229 some virulence will have a finite fitness (because it will kill its host in single and double infections).  
230 Intuitively, this avirulent strategy can also invade because in absence of the virulent strain, the fitness  
231 is always maximised and the advantage reaped by the virulent one in coinfection is not enough to  
232 overcome the cost of killing its singly-infected hosts. This cost of killing the host in single infection  
233 relaxes as mortality increases, leading to a steep increase in virulence. The eventual decrease in viru-  
234 lence is consistent with the evolution of virulence in the absence of immunosuppression (dashed grey  
235 line in Fig. 3a)(van Baalen and Sabelis, 1995, Gandon et al., 2001).

236 Little is known about how immunosuppression impacts host recovery and susceptibility to further  
237 infection. Therefore, we also explored the sensitivity of our co-ESS results to the qualitative shape  
238 of the immunosuppression trade-off and the extent of its concavity using parameters,  $\delta_\sigma$  and  $\delta_\gamma$ . We  
239 find that evolution moves away from the singular strategy when the recovery concavity is highly  
240 accelerating (Fig. 4a) meaning that in this case immunosuppression is either maximised or minimised  
241 depending on the initial conditions. Furthermore, we find that immunosuppression is maximised for  
242 a large area of the near-linear and decelerating recovery trade-off space,  $\delta_\gamma$ . Intermediate ESI levels  
243 are observed for highly decelerating recovery,  $\delta_\gamma$ . Overall, this suggests that there is a tendency  
244 for parasites to specialise in immunosuppressing their host or to completely avoid doing so, and

245 knowledge of the recovery function appears particularly important for predicting immunosuppression  
246 evolution. For virulence, the concavity of the susceptibility function ( $\delta_\sigma$ ) has the strongest quantitative  
247 effect, with decelerating trade-offs leading generally to higher co-ESV. As in the rest of this model,  
248 since the only benefit associated with virulence is increased competitiveness in a coinfecting host, the  
249 co-ESV is an indicator of the importance of this competition in the parasite's life cycle.

## 250 Discussion

251 Host immune responses present a major challenge for parasites and, so, establishing a successful in-  
252 fection often depends upon a parasite's ability to evade host immunity (Schmid-Hempel and Frank,  
253 2007, Kerr et al., 2017). Despite its ubiquity among all major groups of parasitic organisms (Schmid-  
254 Hempel, 2009), the effect of immunosuppression on virulence evolution has largely been overlooked  
255 (but see Koella and Boete, 2003, Hurford and Day, 2013). We modelled immunosuppression through  
256 its joint effect on host recovery and susceptibility to coinfection in an attempt to understand epidemi-  
257 ological forces driving the coevolution of virulence and immunosuppression.

258 We found that immunosuppression increases the optimal parasite exploitation by creating more  
259 coinfections, in which more competitive (and hence more virulent) strains are favoured. On the other  
260 hand, the evolution of immunosuppression is driven by the balance between the benefit conferred by  
261 immunosuppression to evade clearance from the host and the associated cost of contracting further  
262 infections, which introduce a competitor for limited host resources. Because virulence simultaneously  
263 decreases both the benefit (by killing hosts faster) and the cost (by reducing the risk of coinfection),  
264 its effect on the optimal immunosuppression is nuanced — increasing virulence can both increase or  
265 decrease the optimal immunosuppression depending on the baseline virulence of the parasite.

266 We then investigated the change in coevolutionarily optimal strategies of the two traits over host  
267 background mortality. We find that mortality decreases the coevolutionarily stable level of immuno-



268 suppression, which is a lost investment when hosts die too fast anyway. In the absence of immuno-  
269 suppression, we expect the optimal virulence to consistently decrease with host background mortality  
270 because, again, investing in competitive ability (with which virulence correlates) is wasted when  
271 coinfections are rare (van Baalen and Sabelis, 1995, Gandon et al., 2001). When coevolving with  
272 immunosuppression, however, we find that evolutionarily stable virulence peaks for an intermediate  
273 level of host mortality. This stems from the fact that for low host mortality, the coevolutionarily  
274 optimal parasite strategy is to prolong the duration of infection by simultaneously maximising im-  
275 munosuppression and minimising virulence.

276 In light of our theoretical model, we can formulate testable predictions. In *Daphnia*, for example,  
277 the rate of host background mortality can be experimentally manipulated and its effect on virulence  
278 evolution of microsporidian parasites can be quantified (Ebert and Mangin, 1997). Microsporidians  
279 are common eukaryotic parasites of many animals including *Daphnia*, which often harbour multiple  
280 infections (Ebert, 2005). In their mosquito host, microsporidians have been suggested to suppress  
281 host immunity by manipulating the production pathway of a host immune defence molecule (nitric-  
282 oxide, NO), which is part of the innate immune system conserved in all animals (Biron et al., 2005).  
283 Conveniently, the production of NO can also be experimentally enhanced and blocked, making it  
284 possible to investigate the effects of manipulating host immune intensity (Rivero, 2006). While our  
285 model predicts the coevolution of virulence and immunosuppression is likely influenced by the pre-  
286 cise shape of the trade-offs determining the cost and benefit of immunosuppression, there is a dearth  
287 of empirical data with which to calibrate these curves. The *Daphnia* system may offer an opportunity  
288 to characterise immunosuppression trade-offs and advance the understanding of the role of immuno-  
289 suppression in virulence evolution.

290 A natural extension to the model of coinfection by the same species (van Baalen and Sabelis,  
291 1995) is the model that accommodates two distinct resident parasite species, each of which can be  
292 challenged by a mutant (Choisy and de Roode, 2010). Under the different species model, two co-

293 evolving traits (e.g., immunosuppression and virulence) could be carried by two separate parasite  
294 species, which better reflect the reality for some immunosuppressing parasites, e.g., the immunosup-  
295 pressing capabilities of HIV render the host susceptible to the virulence induced by opportunistic  
296 infections. Similarly, in an amphipod system, [Cornet and Sorci \(2010\)](#) show that immunosuppressive  
297 parasites elevate host mortality by promoting opportunistic pathogen infections. Furthermore, there  
298 is evidence that pathological severity of malaria infection can be amplified through immunosuppres-  
299 sion caused by helminths, which are common parasites in malaria prevalent tropical regions ([Graham  
300 et al., 2005](#)). That being said, considering multiple species would force us to revisit our assumption  
301 that more virulent mutants are more competitive than their resident at the within-host level. Indeed,  
302 this assumption has recently been shown to hold for a variety of within-host processes, but only if the  
303 mutant traits are close to that of the resident ([Sofonea et al. in prep](#)). Therefore, adding more details  
304 about the within-host interactions, e.g., via a nested model ([Mideo et al., 2008](#)), seems necessary to  
305 study coinfection by different species.

306 In the present model, we assumed no direct link between immunosuppression and virulence. How-  
307 ever, immune evasion strategies of bacteria and viruses have been empirically linked to a range of  
308 pathological effects ([Casadevall and Pirofski, 2003](#), [Monack et al., 2004](#), [Stanford et al., 2007](#)). On  
309 the other hand, immunosuppression may decrease immunopathology which can, therefore, reduce  
310 host mortality, as shown experimentally using rodent malaria infections ([Long et al., 2008](#), [Long and  
311 Graham, 2011](#)). In fact, helminth therapy, which involves deliberate ingestion of parasitic worms,  
312 takes advantage of the parasite's ability to mediate host immunity and has been successful in coun-  
313 tering inflammations caused by immune-mediated diseases ([Day et al., 2007](#), [Elliott and Weinstock,  
314 2009](#), [Summers et al., 2003](#)).

315 The only cost of immunosuppression we assumed is indirect (coinfection facilitation), however,  
316 the production of immunosuppressive compounds could impose a direct fitness cost to individual par-  
317 asites. At the within-host level, immunosuppression would, therefore, be seen as a public good since

318 parasites that do not invest in it can still reap the benefits (Diard et al., 2013, Rundell et al., 2016). In  
319 fact, our model predicts that invasive repellers are common while coexistence of two strains with ex-  
320 treme immunosuppression strategies (i.e., zero and maximum immunosuppression) is always possible  
321 regardless of trade-off concavity (figure not shown). These findings suggest that it may be common  
322 for some strains to specialise in immunosuppressing and others in exploiting these immunosuppressed  
323 hosts.

324 Understanding how host immunity and the corresponding parasite immune evasion strategies af-  
325 fect virulence evolution is a key challenge for contemporary evolutionary epidemiology (Frank and  
326 Schmid-Hempel, 2008). Our results demonstrate that immune evasion mechanisms are among the  
327 major forces shaping virulence evolution at the between-host level. Future theoretical studies may  
328 focus on multi-species epidemiological dynamics, direct trade-offs between immunosuppression and  
329 virulence and life-history perspectives.

## 330 **Acknowledgements**

331 We thank Sébastien Lion, Stéphane Cornet, Philip Agnew, Matthew Hartfield, Yannis Michalakis and  
332 Mircea Sofonea for comments and discussions and Céline Devaux and Katie O’Dwyer for comments  
333 on an earlier draft. We are also grateful for valuable comments provided by Sara Magalhaes and two  
334 anonymous reviewers through the Peer Community in Evolutionary Biology.

## 335 **References**

336 Abrams, P. A., H. Matsuda, and Y. Harada, 1993. Evolutionarily unstable fitness maxima and stable  
337 fitness minima of continuous traits. *Evolutionary Ecology* 7:465–487.

338 Alizon, S., 2008a. Decreased overall virulence in coinfecting hosts leads to the persistence of virulent

- 339 parasites. *American Naturalist* 172:E67–E79.
- 340 ———, 2008b. Transmission-recovery trade-offs to study parasite evolution. *American Naturalist*  
341 172:E113–E121.
- 342 ———, 2013. Parasite co-transmission and the evolutionary epidemiology of virulence: co-  
343 transmission and virulence evolution. *Evolution* 67:921–933.
- 344 Alizon, S., A. Hurford, N. Mideo, and M. Van Baalen, 2009. Virulence evolution and the trade-  
345 off hypothesis: history, current state of affairs and the future. *Journal of Evolutionary Biology*  
346 22:245–259.
- 347 Alizon, S. and Y. Michalakis, 2015. Adaptive virulence evolution: the good old fitness-based ap-  
348 proach. *Trends in Ecology & Evolution* 30:248–254.
- 349 Alizon, S., J. C. de Roode, and Y. Michalakis, 2013. Multiple infections and the evolution of viru-  
350 lence. *Ecology Letters* 16:556–567.
- 351 Anderson, R. and R. May, 1982. Coevolution of hosts and parasites. *Parasitology* 85:411–426.
- 352 van Baalen, M. and M. W. Sabelis, 1995. The dynamics of multiple infection and the evolution of  
353 virulence. *American Naturalist* Pp. 881–910.
- 354 Balmer, O. and M. Tanner, 2011. Prevalence and implications of multiple-strain infections. *Lancet*  
355 *Infectious Diseases* 11:868–878.
- 356 Bell, A. S., J. C. De Roode, D. Sim, and A. F. Read, 2006. Within-host competition in genetically  
357 diverse malaria infections: parasite virulence and competitive success. *Evolution* 60:1358–1371.
- 358 Ben-Ami, F., L. Mouton, and D. Ebert, 2008. The effects of multiple infections on the expression and  
359 evolution of virulence in a *Daphnia*-endoparasite system. *Evolution* 62:1700–1711.

- 360 Biron, D., P. Agnew, L. Marche, L. Renault, C. Sidobre, and Y. Michalakis, 2005. Proteome of *Aedes*  
361 *aegypti* larvae in response to infection by the intracellular parasite *Vavraia culicis*. *International*  
362 *Journal for Parasitology* 35:1385–1397.
- 363 Bowers, R. G., A. Hoyle, A. White, and M. Boots, 2005. The geometric theory of adaptive evolution:  
364 trade-off and invasion plots. *Journal of Theoretical Biology* 233:363–377.
- 365 Burgyán, J. and Z. Havelda, 2011. Viral suppressors of rna silencing. *Trends in Plant Science* 16:265–  
366 272.
- 367 Casadevall, A. and L.-a. Pirofski, 2003. The damage-response framework of microbial pathogenesis.  
368 *Nature Reviews Microbiology* 1:17–24.
- 369 Choisy, M. and J. C. de Roode, 2010. Mixed infections and the evolution of virulence: effects  
370 of resource competition, parasite plasticity, and impaired host immunity. *American Naturalist*  
371 175:E105–E118.
- 372 Cornet, S. and G. Sorci, 2010. Parasite virulence when the infection reduces the host immune re-  
373 sponse. *Proceedings of the Royal Society B: Biological Sciences* 277:1929–1935.
- 374 Cox, F., 2001. Concomitant infections, parasites and immune responses. *Parasitology* 122:S23–S38.
- 375 Cressler, C. E., D. V. Mcleod, C. Rozins, J. Van Den Hoogen, and T. Day, 2016. The adaptive evolu-  
376 tion of virulence: a review of theoretical predictions and empirical tests. *Parasitology* 143:915–930.
- 377 Day, T., A. L. Graham, and A. F. Read, 2007. Evolution of parasite virulence when host responses  
378 cause disease. *Proceedings of the Royal Society of London B: Biological Sciences* 274:2685–2692.
- 379 Diard, M., V. Garcia, L. Maier, M. N. Remus-Emsermann, R. R. Regoes, M. Ackermann, and W.-D.  
380 Hardt, 2013. Stabilization of cooperative virulence by the expression of an avirulent phenotype.  
381 *Nature* 494:353–356.

- 382 Dieckmann, U., J. A. Metz, and M. W. Sabelis, 2002. Adaptive dynamics of infectious diseases: in  
383 pursuit of virulence management, vol. 2. Cambridge University Press.
- 384 Doorbar, J., W. Quint, L. Banks, I. G. Bravo, M. Stoler, T. R. Broker, and M. A. Stanley, 2012. The  
385 biology and life-cycle of human papillomaviruses. *Vaccine* 30:F55–F70.
- 386 Ebert, D., 2005. Introduction to the ecology, epidemiology, and evolution of parasitism in *Daphnia* .
- 387 Ebert, D. and K. L. Mangin, 1997. The influence of host demography on the evolution of virulence  
388 of a microsporidian gut parasite. *Evolution* Pp. 1828–1837.
- 389 Elliott, D. E. and J. V. Weinstock, 2009. Helminthic therapy: using worms to treat immune-mediated  
390 disease. Pp. 157–166, *in* Pathogen-Derived Immunomodulatory Molecules. Springer.
- 391 Eshel, I., 1983. Evolutionary and continuous stability. *Journal of Theoretical Biology* 103:99–111.
- 392 Ewald, P., 1994. *Evolution of Infectious Disease*. Oxford University Press.
- 393 Ewald, P. W., 1983. Host-parasite relations, vectors, and the evolution of disease severity. *Annual*  
394 *Review of Ecology and Systematics* Pp. 465–485.
- 395 Frank, S. and P. Schmid-Hempel, 2008. Mechanisms of pathogenesis and the evolution of parasite  
396 virulence. *Journal of Evolutionary Biology* 21:396–404.
- 397 Fraser, C., T. D. Hollingsworth, R. Chapman, F. de Wolf, and W. P. Hanage, 2007. Variation in HIV-1  
398 set-point viral load: epidemiological analysis and an evolutionary hypothesis. *Proceedings of the*  
399 *National Academy of Sciences* 104:17441–17446.
- 400 Gandon, S., V. A. Jansen, and M. Van Baalen, 2001. Host life history and the evolution of parasite  
401 virulence. *Evolution* 55:1056–1062.
- 402 Geritz, S. A., G. Mesze, J. Metz, et al., 1998. Evolutionarily singular strategies and the adaptive  
403 growth and branching of the evolutionary tree. *Evolutionary Ecology* 12:35–57.

- 404 Graham, A. L., 2008. Ecological rules governing helminth–microparasite coinfection. *Proceedings*  
405 *of the National Academy of Sciences* 105:566–570.
- 406 Graham, A. L., T. J. Lamb, A. F. Read, and J. E. Allen, 2005. Malaria-filaria coinfection in mice  
407 makes malarial disease more severe unless filarial infection achieves patency. *Journal of Infectious*  
408 *Diseases* 191:410–421.
- 409 Hurford, A. and T. Day, 2013. Immune evasion and the evolution of molecular mimicry in parasites.  
410 *Evolution* 67:2889–2904.
- 411 Juliano, J. J., K. Porter, V. Mwapasa, R. Sem, W. O. Rogers, F. Ariey, C. Wongsrichanalai, A. Read,  
412 and S. R. Meshnick, 2010. Exposing malaria in-host diversity and estimating population diver-  
413 sity by capture-recapture using massively parallel pyrosequencing. *Proceedings of the National*  
414 *Academy of Sciences* 107:20138–20143.
- 415 Kerr, P. J., I. M. Cattadori, J. Liu, D. G. Sim, J. W. Dodds, J. W. Brooks, M. J. Kennett, E. C. Holmes,  
416 and A. F. Read, 2017. Next step in the ongoing arms race between myxoma virus and wild rabbits  
417 in australia is a novel disease phenotype. *Proceedings of the National Academy of Sciences P.*  
418 201710336.
- 419 Kisdi, É., 2006. Trade-off geometries and the adaptive dynamics of two co-evolving species. *Evolu-*  
420 *tionary Ecology Research* 8:959–973.
- 421 Koella, J. C. and C. Boete, 2003. A model for the coevolution of immunity and immune evasion  
422 in vector-borne diseases with implications for the epidemiology of malaria. *American Naturalist*  
423 161:698–707.
- 424 Levy, J., 1998. *HIV and the pathogenesis of AIDS*. ASM Press.
- 425 Lipsitch, M., C. Colijn, T. Cohen, W. P. Hanage, and C. Fraser, 2009. No coexistence for free: neutral  
426 null models for multistrain pathogens. *Epidemics* 1:2–13.

- 427 Long, G. H., B. H. Chan, J. E. Allen, A. F. Read, and A. L. Graham, 2008. Experimental manipulation  
428 of immune-mediated disease and its fitness costs for rodent malaria parasites. *BMC Evolutionary*  
429 *Biology* 8:128.
- 430 Long, G. H. and A. L. Graham, 2011. Consequences of immunopathology for pathogen virulence  
431 evolution and public health: malaria as a case study. *Evolutionary Applications* 4:278–291.
- 432 Marrow, P., U. Dieckmann, and R. Law, 1996. Evolutionary dynamics of predator-prey systems: an  
433 ecological perspective. *Journal of Mathematical Biology* 34:556–578.
- 434 Maynard Smith, J., 1982. *Evolution and the Theory of Games*. Cambridge University Press.
- 435 Méthot, P.-O., 2012. Why do parasites harm their host? on the origin and legacy of theobald smith's"  
436 law of declining virulence"—1900-1980. *History and Philosophy of the Life Sciences* Pp. 561–601.
- 437 Mideo, N., 2009. Parasite adaptations to within-host competition. *Trends in Parasitology* 25:261–268.
- 438 Mideo, N., S. Alizon, and T. Day, 2008. Linking within-and between-host dynamics in the evolution-  
439 ary epidemiology of infectious diseases. *Trends in Ecology & Evolution* 23:511–517.
- 440 Monack, D. M., A. Mueller, and S. Falkow, 2004. Persistent bacterial infections: the interface of the  
441 pathogen and the host immune system. *Nature Reviews Microbiology* 2:747–765.
- 442 Otto, S. P. and T. Day, 2007. *A biologist's guide to mathematical modeling in ecology and evolution*,  
443 vol. 13. Princeton University Press.
- 444 Palefsky, J. M. and E. A. Holly, 2003. Immunosuppression and co-infection with HIV. *JNCI Mono-*  
445 *graphs* 2003:41–46.
- 446 Petney, T. N. and R. H. Andrews, 1998. Multiparasite communities in animals and humans: frequency,  
447 structure and pathogenic significance. *International Journal for Parasitology* 28:377–393.



- 448 Read, A. F., 1994. The evolution of virulence. *Trends in Microbiology* 2:73–76.
- 449 Read, A. F. and L. H. Taylor, 2001. The ecology of genetically diverse infections. *Science* 292:1099–  
450 1102.
- 451 Rivero, A., 2006. Nitric oxide: an antiparasitic molecule of invertebrates. *Trends in Parasitology*  
452 22:219–225.
- 453 Rockstroh, J. K. and U. Spengler, 2004. HIV and hepatitis C virus co-infection. *Lancet Infectious*  
454 Diseases 4:437–444.
- 455 de Roode, J. C., R. Pansini, S. J. Cheesman, M. E. Helinski, S. Huijben, A. R. Wargo, A. S. Bell,  
456 B. H. Chan, D. Walliker, and A. F. Read, 2005. Virulence and competitive ability in genetically  
457 diverse malaria infections. *Proceedings of the National Academy of Sciences of the United States*  
458 of America 102:7624–7628.
- 459 de Roode, J. C., A. J. Yates, and S. Altizer, 2008. Virulence-transmission trade-offs and population  
460 divergence in virulence in a naturally occurring butterfly parasite. *Proceedings of the National*  
461 *Academy of Sciences* 105:7489–7494.
- 462 Råberg, L., 2012. Infection intensity and infectivity of the tick-borne pathogen *Borrelia afzelii*. *Jour-*  
463 *nal of Evolutionary Biology* 25:1448–53.
- 464 Rundell, E. A., S. A. McKeithen-Mead, and B. I. Kazmierczak, 2016. Rampant cheating by  
465 pathogens? *PLoS Pathogens* 12:e1005792.
- 466 Sarmiento, R. A., F. Lemos, P. M. Bleeker, R. C. Schuurink, A. Pallini, M. G. A. Oliveira, E. R.  
467 Lima, M. Kant, M. W. Sabelis, and A. Janssen, 2011. A herbivore that manipulates plant defence.  
468 *Ecology Letters* 14:229–236.

- 469 Schmid-Hempel, P., 2008. Parasite immune evasion: a momentous molecular war. *Trends in Ecology*  
470 & *Evolution* 23:318–326.
- 471 ———, 2009. Immune defence, parasite evasion strategies and their relevance for 'macroscopic  
472 phenomena' such as virulence. *Philosophical Transactions of the Royal Society B: Biological*  
473 *Sciences* 364:85–98.
- 474 ———, 2011. *Evolutionary parasitology: the integrated study of infections, immunology, ecology,*  
475 *and genetics.* Oxford University Press New York.
- 476 Schmid-Hempel, P. and S. A. Frank, 2007. Pathogenesis, virulence, and infective dose. *PLoS*  
477 *Pathogens* 3:e147.
- 478 Stanford, M. M., G. McFadden, G. Karupiah, and G. Chaudhri, 2007. Immunopathogenesis of  
479 poxvirus infections: forecasting the impending storm. *Immunology and Cell Biology* 85:93–102.
- 480 Summers, R. W., D. E. Elliott, K. Qadir, J. F. Urban, R. Thompson, and J. V. Weinstock, 2003.  
481 *Trichuris suis* seems to be safe and possibly effective in the treatment of inflammatory bowel dis-  
482 ease. *American Journal of Gastroenterology* 98:2034–2041.
- 483 Virgin, H. W., E. J. Wherry, and R. Ahmed, 2009. Redefining chronic viral infection. *Cell* 138:30–50.
- 484 Zwart, M. P., W. Van Der Werf, M. M. Van Oers, L. Hemerik, J. Van Lent, J. De Visser, J. M. Vlak,  
485 and J. S. Cory, 2009. Mixed infections and the competitive fitness of faster-acting genetically  
486 modified viruses. *Evolutionary Applications* 2:209–221.

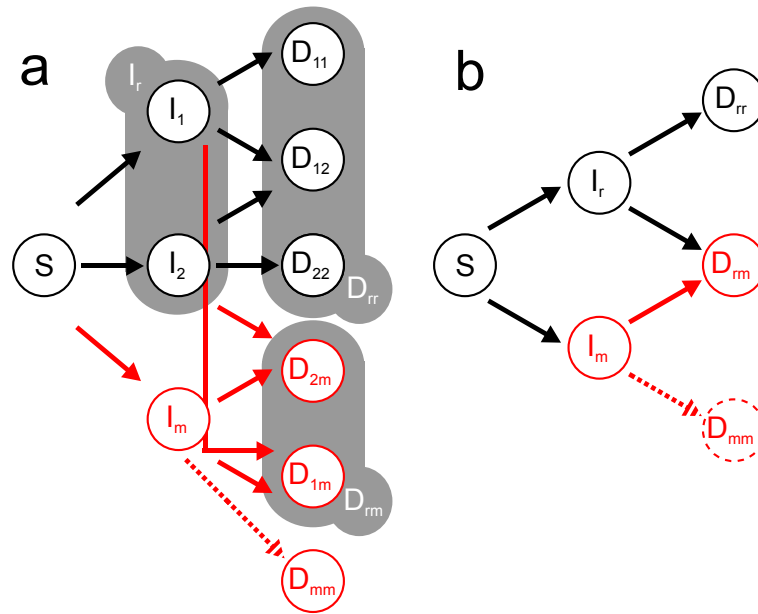

Fig. 1: Evolutionary epidemiology model for (a) coinfections by parasites from different species and (b) from same species. In black is the resident system (two strains, one for each species, in (a; labeled 1 and 2) and one strain in (b; labeled r)) and in red are the host classes related to the rare mutant (labeled m). The one species model (b) is a special case of the two species model (a) because the grey bubbles in (a) can be simplified to formulate the one species model (b) when within-host parameters are identical between the two parasite species.

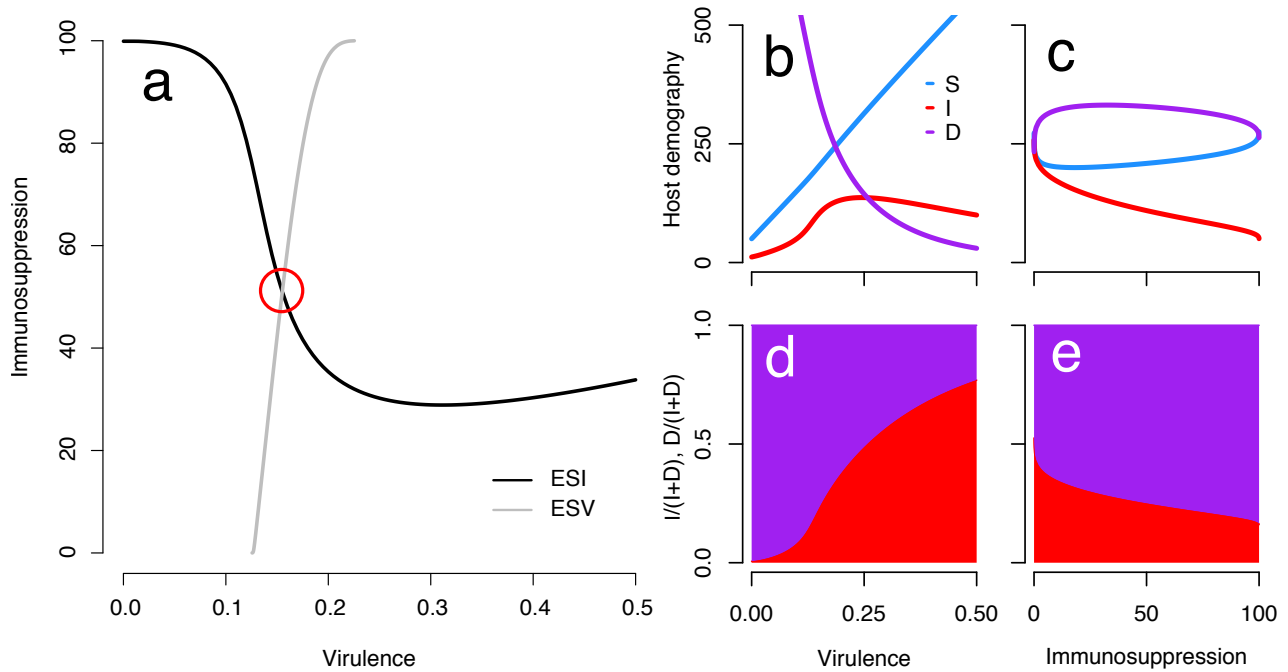

Fig. 2: (a) Evolutionarily stable immunosuppression (ESI; black) and virulence (ESV; grey) against fixed values of the other trait. The co-evolutionarily stable strategy (co-ESS) of the two traits occurs at the intersection of the two lines, indicated by the red circle. The immunosuppression trade-offs for the recovery rate and additional susceptibility were decelerating and accelerating, respectively with shape parameters  $\delta_\gamma = 0.05$  and  $\delta_\sigma = 0.25$ . The equilibrium population size of the three host classes — susceptible ( $S$ ; blue), singly infected ( $I$ ; red) and doubly infected ( $D$ ; purple) — underlying the ESI over a range of of virulence and the ESV over a range of immunosuppression values is presented in (b) and (c). The relative abundances of singly (red) and doubly (purple) infected host are plotted in (d) and (e).

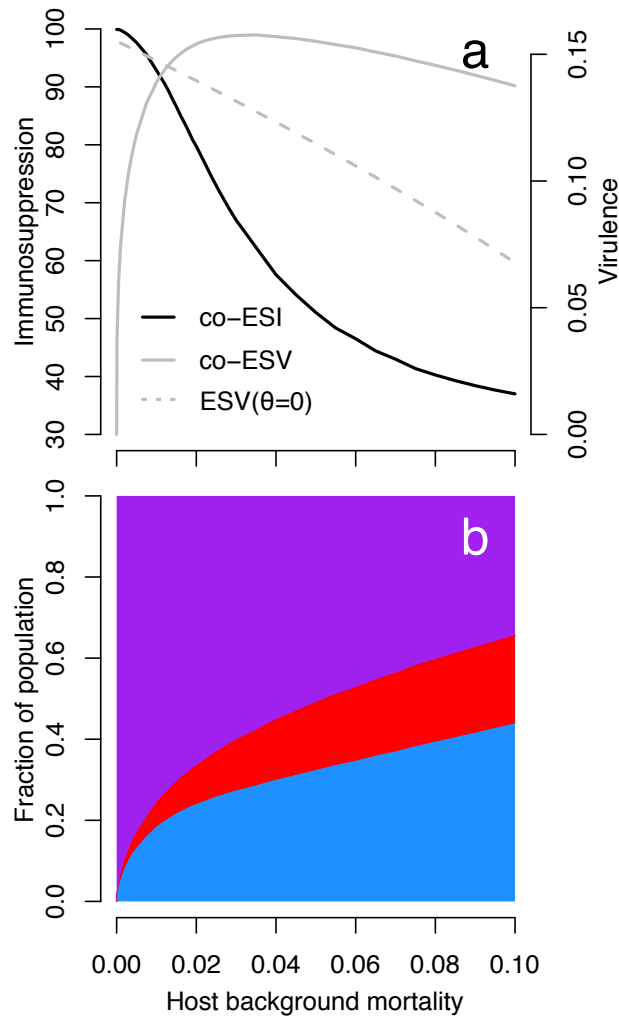

Fig. 3: (a) Coevolutionarily stable immunosuppression (co-ESI; black) and virulence (co-ESV; solid grey) strategies, and evolutionarily stable virulence strategy in the absence of immunosuppression (ESV ( $\theta = 0$ ); dashed grey) against host background mortality and (b) the fraction of population of the three host classes — susceptible ( $S$ ; blue), singly infected ( $I$ ; red) and doubly infected ( $D$ ; purple) at the coevolutionarily stable state.

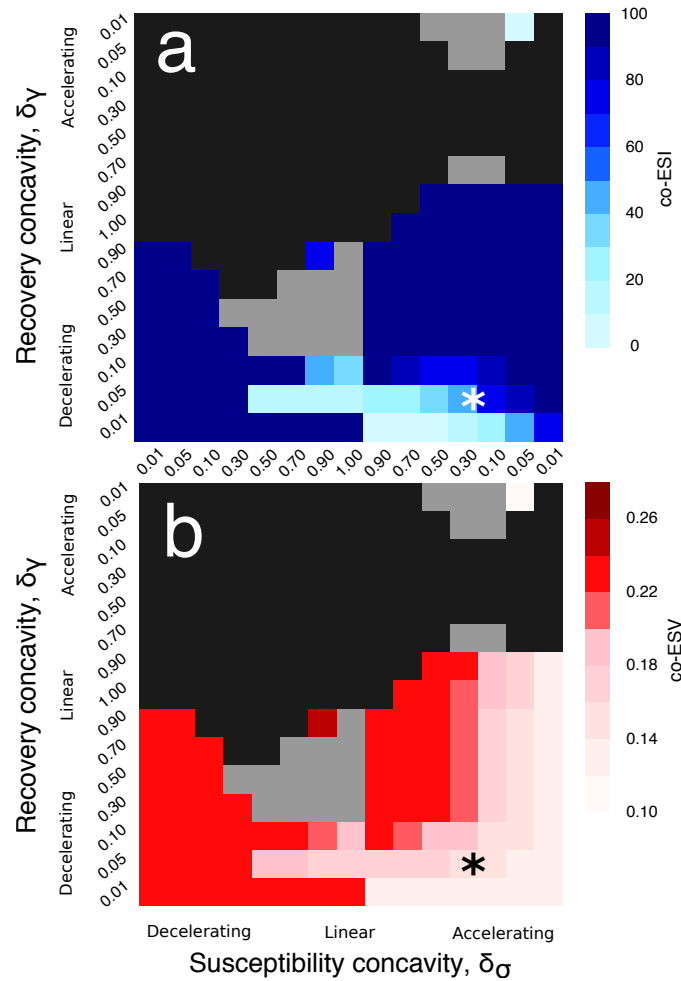

Fig. 4: The trade-off concavity influences the coevolutionary outcome. The shade of blue and red indicates the coevolutionarily stable strategy value of (a) immunosuppression and (b) virulence, respectively. The asterisk (\*) indicates the default set of trade-off parameters explored in Figure 2 and 3. The dark grey areas indicate that the coevolutionarily singular strategy is an invasive repeller. The light grey squares indicate that the outcome of coevolutionary stability depends on the details of the rate and variance of mutational inputs of the two coevolving traits.
